# Supplementary material for: The vaginal Torquetenovirus titer varies with vaginal microbiota composition in pregnant women
Source: PubMed Central journal article supplement (PMC8775304; doi:10.1371/journal.pone.0262672), 2022-01-20
Supplement: pone.0262672.s002.pdf [file pone.0262672.s002.pdf]

**S1 Table. Association between the TTV titer in vaginal secretions and the dominant bacterium in the vaginal microbiome**

| Dominant bacterium    | No. women | Median log <sub>10</sub> TTV titer (Interquartile range) <sup>a</sup> |
|-----------------------|-----------|-----------------------------------------------------------------------|
| <i>L. crispatus</i>   | 206       | 1.6 (<1.0, 4.4) <sup>b</sup>                                          |
| <i>L. iners</i>       | 159       | 4.1 (<1.0, 5.1)                                                       |
| <i>L. jensenii</i>    | 16        | 0.0 (<1.0, 4.8)                                                       |
| <i>L. gasseri</i>     | 12        | 1.5 (<1.0, 5.3)                                                       |
| <i>L. delbrueckii</i> | 1         | <1.0                                                                  |
| <i>L. vaginalis</i>   | 1         | <1.0                                                                  |
| <i>G. vaginalis</i>   | 59        | 4.4 (<1.0, 5.5)                                                       |
| <i>Leptopiraceae</i>  | 4         | 5.2 (3.8, 6.0)                                                        |
| None                  | 36        | 4.4 (3.4, 5.0)                                                        |

Dominant bacterium indicates >50% of the total bacteria identified. None indicates samples in which no bacterium was present at >50%.

<sup>a</sup>Differences in TTV titer when different bacteria dominate p = 0.0001 (Kruskal-Wallis test)

<sup>b</sup>p = 0.0001 vs. *L. iners*, 0.0009 vs. None, 0.0016 vs. *G. vaginalis* (Mann-Whitney test).
