# Supplementary material for: The vaginal Torquetenovirus titer varies with vaginal microbiota composition in pregnant women
Source: PubMed Central journal article supplement (PMC8775304; doi:10.1371/journal.pone.0262672), 2022-01-20
Supplement: pone.0262672.s003.pdf [file pone.0262672.s003.pdf]

**S2 Table. Association between TTV titer in vaginal secretions and race**

| Race  | No. women | Median TTV titer (Interquartile range) |
|-------|-----------|----------------------------------------|
| White | 230       | 3.7 (<1.0,5.0)                         |
| Mixed | 195       | 3.7 (<1.0, 5.1)                        |
| Black | 37        | 4.2 (<1.0, 5.0)                        |

p = 0.9183 (Kruskal-Wallis test)
