# Supplementary material for: The vaginal Torquetenovirus titer varies with vaginal microbiota composition in pregnant women
Source: PubMed Central journal article supplement (PMC8775304; doi:10.1371/journal.pone.0262672), 2022-01-20
Supplement: pone.0262672.s004.pdf [file pone.0262672.s004.pdf]

**S3 Table. TTV titer by site**

| Site      | No. samples | Median TTV titer (Interquartile range) |
|-----------|-------------|----------------------------------------|
| Fortaleza | 50          | 2.6 (<1.0, 4.6)                        |
| Jundaia   | 148         | 3.8 (<1.0, 5.2)                        |
| Sao Paulo | 279         | 3.7 (<1.0, 5.0)                        |

p = 0.2941 (Kruskal-Wallis test)
